# Supplementary material
Source: Springer Nature journal article supplement (https://www.springermedizin.de/resource/supplementary/12970_2007_40_MOESM4_ESM.pdf/9594286)

# Changes in lactic acid concentrations [%]

Without supplementation

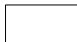

With PC supplementation

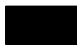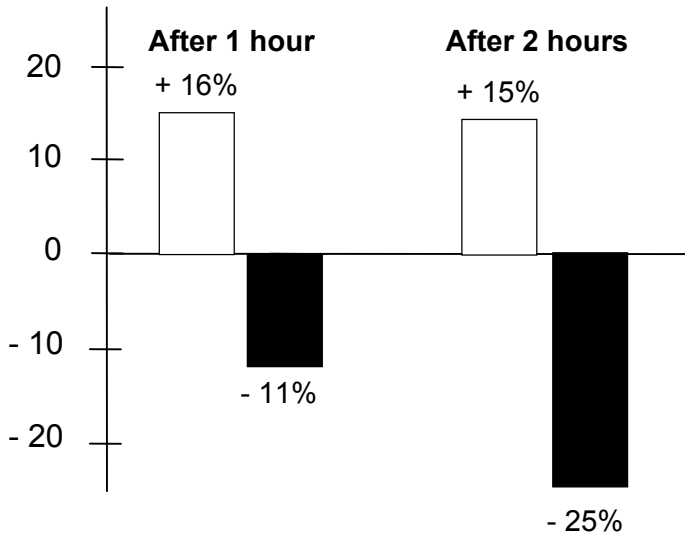

Supplement: MOESM4 [file 9594286]
